# Supplementary material for: Evaluation of Sutureless, Glueless, Flapless, Intrascleral Fixated Posterior Chamber Intraocular Lens in Children with Ectopia Lentis
Source: J Ophthalmol. 2018 Aug 29;2018:3212740. doi: 10.1155/2018/3212740 (PMC6136496; doi:10.1155/2018/3212740)
Supplement: Supplementary Materials — Raw data for “Evaluation of sutureless, glueless, flapless, intrascleral fixated posterior chamber intraocular lens in children with ectopia lentis.” Description of data: (1) Age at time of SFIOL: age in years at the time of scleral fixated intraocular surgery; (2) Sex: M is male and F is female; (3) Pre-UV (S) means preoperative uncorrected visual acuity in Snellen; (4) Pre-UV (L) means preoperative uncorrected visual acuity in logMAR; (5) Pre-BV (S) means preoperative best-corrected visual acuity in Snellen; (6) Pre-BV (L) means preoperative best-corrected visual acuity in logMAR; (7) Postop Cx: any postoperative complication; (8) Post-UV (S) means postoperative uncorrected visual acuity in Snellen; (9) Post-UV (L) means postoperative uncorrected visual acuity in logMAR; (10) Post R (S) means postoperative refractive spherical error; (11) Post R (C) means postoperative refractive cylindrical error; (12) Emet means postoperative emmetropia: 0 means no and 1 means yes; (13) <1 DC means postoperative refractive cylindrical error <1 DC; (14) Seq means spherical equivalent; (15) Post-BV (S) means postoperative best-corrected visual acuity in Snellen; (16) Post-BV (L) means postoperative best-corrected visual acuity in logMAR; (17) FU means total follow-up of the patient; (18) 2-line means 2-line improvement in best-corrected visual acuity after the surgery: 0 means no and 1 means yes. [file 3212740.f1.xlsx]

## Sheet: Sheet1
S.no.	Age at time of SFIOL	Sex	Pre UV(S)	Pre UV(L)	Pre R (S)	Pre BV (S)	Pre BV (L)	Post-op Cx	Post UV(S)	Post UV(L)	Post R (S)	Post R (C)	Emet	<1 DC	S eq	Post BV(S)	Post BV(L)	FU	2 line
2	18	M	3/60	1.3	9	6/12	0.3	-	6/12	0.3	-0.75	0.75	0	1	-0.375	6/6	0	31	1
3	18	M	3/60	1.3	10	6/18	0.48	Decent	6/12	0.3	0	0.75	0	1	0.375	6/9	0.18	30	1
4	11	M	5/60	1.08	0	5/60	1.08	-	6/60	1	-3.5	1	0	1	-3	6/24	0.6	48	1
5	11	M	5/60	1.08	0	5/60	1.08	-	6/36	0.78	-3.5	1.5	0	0	-2.75	6/12	0.3	54	1
7	11	M	1/60	1.78	13	6/9	0.18	-	6/12	0.3	-0.75	0	0	1	-0.75	6/9	0.18	25	0
8	11	M	1/60	1.78	13	6/9	0.18	-	6/12	0.3	-0.75	0	0	1	-0.75	6/9	0.18	22	0
10	14	M	2/60	1.48	7	4/60	1.18	-	6/36	0.78	0	2	0	0	1	6/24	0.6	12	1
13	14	F	4/60	1.18	12	6/18	0.48	-	6/18	0.48	0	1.75	0	0	0.875	6/6	1	18	1
14	14	F	4/60	1.18	14	6/18	0.48	Op capture	6/18	0.48	0	1.75	0	0	0.875	6/6	1	18	1
17	12	F	1/60	1.78	11	6/9	0.18	-	6/9	0.18	0	0	1	1	0	6/9	0.18	12	0
18	12	F	1/60	1.78	10	6/9	0.18	-	6/9	0.18	0	0	1	1	0	6/9	0.18	12	0
19	12	F	3/60	1.3	-7	6/12	0.3	-	6/6	0	0	0	1	1	0	6/6	0	41	1
20	12	F	3/60	1.3	-8	6/18	0.48	-	6/12	0.3	0	1.5	0	0	0.75	6/6	0	37	1
21	8	F	1/60	1.78	12	6/36	0.78	Hyphaema	6/18	0.48	0	1	0	1	0.5	6/9	0.18	12	1
22	8	F	1/60	1.78	11	6/36	0.78	-	6/9	0.18	0	1	0	1	0.5	6/9	0.18	12	1
23	18	F	2/60	1.48	11	6/9	0.18	-	6/18	0.48	0	1.25	0	0	0.625	6/9	0.18	12	0
24	10	F	1/60	1.78	13	6/6	0	-	6/12	0.3	0	1.25	0	0	0.625	6/9	0.18	25	0
25	10	F	2/60	1.48	12.5	6/6	0	-	6/12	0.3	-0.5	1.5	0	0	0.25	6/6	0	26	0
28	15	F	1/60	1.78	9	6/60	1	-	6/18	0.48	1.5	0	0	1	1.5	6/12	0.3	12	1
29	15	F	1/60	1.78	9	4/60	1.18	-	6/9	0.18	1.5	0	0	1	1.5	6/6	1	12	1
32	17	M	3/60	1.3	8	6/36	0.78	Hyphaema	6/12	0.3	0.75	0	0	1	0.75	6/9	0,18	12	1
33	17	M	3/60	1.3	9	6/36	0.78	Hyphaema	6/36	0.78	2	0.75	0	1	2.375	6/18	0.48	12	1
38	15	F	1/60	1.78	12	6/18	0.48	VH	6/18	0.48	0	1	0	1	0.5	6/6	0	12	1
44	7	M	3/60	1.3	9	6/12	0.3	-	6/12	0.3	-0.75	1	0	1	-0.25	6/6	0	31	1
45	7	M	3/60	1.3	10	6/18	0.48	Hyphaema	6/12	0.3	0.75	0	0	1	0.75	6/9	0.18	18	1
46	15	F	1/60	1.78	12	6/12	0.3	-	6/18	0.48	0	1	0	1	0.5	6/6	0	12	1
48	7	F	1/60	1.78	10	6/9	0.18	-	6/12	0.3	0.5	1.5	0	0	1.25	6/9	0.18	12	0
49	7	F	1/60	1.78	10	6/9	0.18	-	6/18	0.48	0.5	2.5	0	0	1.75	6/9	0.18	12	0
50	12	F	1/60	1.78	13	6/9	0.18	-	6/9	0.18	0	0	1	1	0	6/9	0.18	12	0
51	12	F	1/60	1.78	13	6/9	0.18	-	6/9	0.18	0	0	1	1	0	6/9	0.18	12	0
52	17	F	1/60	1.78	12	6/9	0.18	-	6/9	0.18	0	0	1	1	0	6/9	0.18	12	0
53	17	F	1/60	1.78	12	6/9	0.18	-	6/9	0.18	0	0	1	1	0	6/9	0.18	12	0
55	18	M	1/60	1.78	-16	6/24	0.6	-	6/18	0.48	0	0	1	1	0	6/18	0.48	12	0
60	12	M	1/60	1.78	14	6/6	0	-	6/12	0.3	0	1.25	0	0	0.625	6/9	0.18	62	0
61	12	M	1/60	1.78	13	6/9	0.18	-	6/12	0.3	0	1	0	1	0.5	6/9	0.18	62	0
62	18	M	1/60	1.78	12	6/6	0	-	6/9	0.18	0	0	1	1	0	6/9	0.18	12	0
63	18	M	2/60	1.48	-9.5	6/9	0.18	-	6/6	0	0	0	1	1	0	6/6	0	12	0
64	18	M	1/60	1.78	11	6/6	0	-	6/6	0	0	0	1	1	0	6/6	0	12	0
64	18	M	1/60	1.78	11	6/6	0	-	6/6	0	0	0	1	1	0	6/6	0	12	0
65	18	F	2/60	1.48	12.5	6/6	0	Hypotony	6/9	0.18	0	0	1	1	0	6/6	0	12	0
	13.4			1.78			0.24			0.3		0.675	13	29	0.2625		0.18	62
	3.71276			1.78			1.18			1		0.725453			0.970643		0.48	12
				1.08			0			0							0
